# Supplementary material for: Nonribosomal Peptides Produced by Minimal and Engineered Synthetases with Terminal Reductase Domains
Source: PubMed Central journal article supplement (PMC7586950; doi:10.1002/cbic.202000176), 2020-06-25
Supplement: CBIC-21-2750-s001.pdf [file CBIC-21-2750-s001.pdf]

# ChemBioChem

Supporting Information

## **Nonribosomal Peptides Produced by Minimal and Engineered Synthetases with Terminal Reductase Domains**

Andreas Tietze, Yan-Ni Shi, Max Kronenwerth, and Helge B. Bode\*

**Supplementary Table 1.** Strains used and generated in this work.

| Strain                                            | Genotype                                                                                                           | Reference  |
|---------------------------------------------------|--------------------------------------------------------------------------------------------------------------------|------------|
| <i>E. coli</i> BL21 DE3                           | F <sup>-</sup> ompT hsdSB(rB- mB-) gal dcm lon λ(DE3 [lacI lacUV5-T7 gene 1 ind1 sam7 nin5])                       | Invitrogen |
| <i>E. coli</i> BL21 DE3 pET11a_xind01729 pCK_mtaA | <i>E. coli</i> BL21star DE3 pET11a_xind01729 pCK_mtaA, Amp <sup>R</sup> , Cm <sup>R</sup>                          | This work  |
| <i>E. coli</i> DH10B                              | F_ mcrA (mrr-hsdRMS-mcrBC), 80lacZΔ, M15, ΔlacX74 recA1 endA1 araD 139 Δ(ara, leu)7697 galU galK lrpSL (Strr) nupG | [1]        |
| <i>E. coli</i> DH10B::mtaA                        | DH10B with mtaA from pCK_mtaA ΔentD                                                                                | [2]        |
| <i>E. coli</i> ST18                               |                                                                                                                    | [3]        |
| <i>E. coli</i> ST18 pCEP-Kan_xind01729            | <i>E. coli</i> ST18 pCEP-Kan_xind01729, Kan <sup>R</sup>                                                           | This work  |
| <i>S. cerevisiae</i> CEN.PK 2-1C                  | MATa; his3D1; leu2-3_112; ura3-52; trp1-289; MAL2-8c; SUC2                                                         | Euroscarf  |
| <i>P. luminescens</i> TT01                        |                                                                                                                    | DSMZ       |
| <i>Xenorhabdus</i> sp. TS4                        |                                                                                                                    | DSMZ       |
| <i>X. eapokensis</i> DL20                         |                                                                                                                    | DSMZ       |
| <i>X. budapestensis</i> DSM 16342                 |                                                                                                                    | DSMZ       |
| <i>X. indica</i> DSM 17382                        |                                                                                                                    | DSMZ       |
| <i>X. indica</i> DSM 17382::pCEP-Kan_xind01729    | <i>X. indica</i> DSM 17904::pCEP-Kan_xind01729, Kan <sup>R</sup>                                                   | This work  |
| <i>E. coli</i> DH10B::mtaA pAT41_NRPS-1           | <i>E. coli</i> DH10B::mtaA pAT41_NRPS-1, Kan <sup>R</sup>                                                          | This work  |
| <i>E. coli</i> DH10B::mtaA pAT41_NRPS-2           | <i>E. coli</i> DH10B::mtaA pAT41_NRPS-2, Kan <sup>R</sup>                                                          | This work  |
| <i>E. coli</i> DH10B::mtaA pAT41_NRPS-3           | <i>E. coli</i> DH10B::mtaA pAT41_NRPS-3, Kan <sup>R</sup>                                                          | This work  |
| <i>E. coli</i> DH10B::mtaA pAT41_NRPS-4           | <i>E. coli</i> DH10B::mtaA pAT41_NRPS-4, Kan <sup>R</sup>                                                          | This work  |
| <i>E. coli</i> DH10B::mtaA pAT41_NRPS-5           | <i>E. coli</i> DH10B::mtaA pAT41_NRPS-5, Kan <sup>R</sup>                                                          | This work  |
| <i>E. coli</i> DH10B::mtaA pAT41_NRPS-6           | <i>E. coli</i> DH10B::mtaA pAT41_NRPS-6, Kan <sup>R</sup>                                                          | This work  |
| <i>E. coli</i> DH10B::mtaA pAT41_NRPS-7           | <i>E. coli</i> DH10B::mtaA pAT41_NRPS-7, Kan <sup>R</sup>                                                          | This work  |
| <i>E. coli</i> DH10B::mtaA pAT41_NRPS-8           | <i>E. coli</i> DH10B::mtaA pAT41_NRPS-8, Kan <sup>R</sup>                                                          | This work  |

**Supplementary Table 2.** Oligonucleotides used in this work.

| Plasmid           | Oligonucleotide                                                            | Sequence (5'->3')                                                       | Template            |
|-------------------|----------------------------------------------------------------------------|-------------------------------------------------------------------------|---------------------|
| pCEPKan_xind01729 | pCEP_fw_gib                                                                | ATGTGCATGCTCGAGCTC                                                      | pCEP-Kan            |
|                   | pCEP_rv_gib                                                                | ATGCTAGCCTCCTGTTAGC                                                     |                     |
|                   | PF_7                                                                       | TTTTGGGCTAACAGGAGGCTAGCATATGATAAATACCACCCCTATAATTTTCG                   |                     |
|                   | PF_8                                                                       | ATCTGCAGAGCTCGAGCATGCACATCGTGGCCGTCATAATCAGAC                           |                     |
| pET11a_xind01729  | pET11a_for_strep-tag                                                       | GTAGGATGGAGCCATCCACAGTTCGAGAAGTAAGGATCCGGCTGCTAAC                       | pET11a-modified     |
|                   | pET11a rev                                                                 | ATGTATATCTCCTTCTTAAAGTTAAACAAAATTATTCTA                                 | X. indica DSM 17382 |
|                   | PF_15                                                                      | TTAACTTTAAGAAGGAGATATACATATGATAAATACCACCCCTATAATTTTCG                   |                     |
| PF_16             | CGAACTGTGGATGGCTCCATCCTACTGATAAAAAACCTATTTTTTTCCAGTAAGTAAGATAAC            |                                                                         |                     |
| pAT41_NRPS-1      | AT_293                                                                     | GATACCTATCTGAATAGTGATAAAAAATCAAATAATG                                   | pAT41_NRPS-2        |
|                   | AT_470                                                                     | TCAGATTCGGTGATGTTTCGTC                                                  | pAT41_NRPS-4        |
|                   | AT_471                                                                     | ACGAACATCACGAAATCTGACGCTCAAATCAGTGGTGGC                                 |                     |
|                   | AT_483                                                                     | TCACTATTCAGATAGGTATCCAATGTTGGGCCAACTCCG                                 |                     |
|                   |                                                                            |                                                                         |                     |
| pAT41_NRPS-2      | pAT41_bb+Ypet_fw                                                           | GGATCCGCTGGCTCC                                                         | pAT41_NRPS-4        |
|                   | AT_451                                                                     | GATTTTCTCGGTAAATGTCGCC                                                  | X. indica DSM 17382 |
|                   | AT_454                                                                     | ATTGGCGACATTTACCAGAAAAATCCAACAAAACAAGAACGAGCTCACTG                      |                     |
|                   | AT_455                                                                     | AACCAGCAGCGGAGCCAGCGGATCCCTATGATAAAAAACCTATTTTTTTCCAGTAAGTAAGATAAC      |                     |
|                   |                                                                            |                                                                         |                     |
| pAT41_NRPS-3      | AT_293                                                                     | GATACCTATCTGAATAGTGATAAAAAATCAAATAATG                                   | pAT41_NRPS-4        |
|                   | AT_470                                                                     | TCAGATTCGGTGATGTTTCGTC                                                  | pAT41_NRPS-4        |
|                   | AT_471                                                                     | ACGAACATCACGAAATCTGACGCTCAAATCAGTGGTGGC                                 |                     |
|                   | AT_483                                                                     | CGGTGATGTTCTGTCTGGTCTACACTCAGAGTCTGGGCGACAAA                            |                     |
|                   |                                                                            |                                                                         |                     |
| pAT41_NRPS-4      | pAT41_bb+YPet_fw                                                           | GGATCCGCTGGCTCC                                                         | pAT41               |
|                   | pAT41_bb_rv                                                                | GGAATTCCTCCTGTTAGCCC                                                    | P. luminescens TT01 |
|                   | AL_GxpS-2-1                                                                | ACTGTTTCTCCATACCCGTTTTTTTTGGGCTAACAGGAGGAATTCCATGAAAGATAGCATGGCTAAAAAGG |                     |
|                   | AT_328                                                                     | TTTCATTATTTGATTTTTTATCACTATTCAGATAGGTATCGATTTTCTCGGTAAATGTCGCC          |                     |
|                   | AT_308                                                                     | GATACCTATCTGAATAGTGATAAAAAATCAAATAATGAAATAAAAAATAC                      |                     |
| AT_289            | TCATGAACCTCGCCAGAACCCAGCAGCGGAGCCAGCGGATCCCTTACTTTCAGGTTTATATGACGGTATGCTTG |                                                                         |                     |
| pAT41_NRPS-5      | pAT41_bb+Ypet_fw                                                           | GGATCCGCTGGCTCC                                                         | pAT41_NRPS-4        |
|                   | AT_458                                                                     | CGCGACATAAATTTGGCGAG                                                    | X. eapokensis DL20  |
|                   | AT_460                                                                     | TTTTGCTCGCAAATTTATGTGCGGTTCTGACTTCAACCGAACAAACAG                        |                     |
|                   | AT_459                                                                     | (AACCAGCAGCGGAGCCAGCGGATCCTTACTTACTTTCAGGTTTATATGACGGTATGC              |                     |
|                   |                                                                            |                                                                         |                     |
| pAT41_NRPS-6      | pAT41_bb+Ypet_fw                                                           | GGATCCGCTGGCTCC                                                         | pAT41_NRPS-4        |
|                   | AT_451                                                                     | GATTTTCTCGGTAAATGTCGCC                                                  | X. TS4              |
|                   | AT_452                                                                     | ATTGGCGACATTTACCAGAAAAATCGAAATTTATCGGCGGAAGG                            |                     |
|                   | AT_453                                                                     | AACCAGCAGCGGAGCCAGCGGATCCTTATTTCTGTTCTGTGTCTGGTGTG                      |                     |
|                   |                                                                            |                                                                         |                     |
| pAT41_NRPS-7      | pAT41_bb+Ypet_fw                                                           | GGATCCGCTGGCTCC                                                         | pAT41_NRPS-4        |
|                   | AT_451                                                                     | GATTTTCTCGGTAAATGTCGCC                                                  | S. lugdunensis      |
|                   | AT_456                                                                     | ATTGGCGACATTTACCAGAAAAATCGAACAGCAAAGTGACGAATCGTG                        |                     |
|                   | AT_457                                                                     | AACCAGCAGCGGAGCCAGCGGATCCTCATCTATGGTATTCTTTACATTCAAATTTTTCATTG          |                     |
|                   |                                                                            |                                                                         |                     |
| pAT41_NRPS-8      | pAT41_bb+YPet_fw                                                           | GGATCCGCTGGCTCC                                                         | pAT41_NRPS-4        |

pAT41\_bb\_rv  
JK-P1

GGAATTCCTCCTGTTAGCCC

CGGATCCTACCTGACGCTTTTTATCGCAACTCTCTACTGTTTCTCCATACCCGTTTTTTTTGGGCTAACAGGAGG pFF1\_NRPS\_5\*

AATCCATGAAAGATAACATTGCTACAGTGG

AT\_328

TTTCATTATTTGATTTTTTATCACTATTCAGATAGGTATCGATTTTCTCGGTAAATGTCGCC

AT\_308

GATACCTATCTGAATAGTGATAAAAAATCAAATAATGAAATAAAAAATAC

*X. eapokensis* DL20

AT\_289

TCATGAACTCGCCAGAACCAGCAGCGGAGCCAGCGGATCCCTTACTTTCAGGTTTATATGACGGTATGCTTG

---

**Supplementary Table 3.** Plasmids used and generated in this work. pFF1\_NRPS\_5 from <sup>(L41)</sup> is indicated with an \* to avoid confusion with NRPSs constructed in this work.

| Plasmid            | Genotype                                                                                                                                                                                            | Reference |
|--------------------|-----------------------------------------------------------------------------------------------------------------------------------------------------------------------------------------------------|-----------|
| pAT41              | 2 $\mu$ ori, URA3, P <sub>BAD</sub> promoter, pCOLA ori, Ypet-Flag, Kan <sup>R</sup> , MCS                                                                                                          | [4]       |
| pCK_mtaA           | Cm <sup>R</sup> , ori p15A, <i>mtaA</i>                                                                                                                                                             | [5]       |
| pET11a-modified    | pBR322 ori, P <sub>T7</sub> promoter, Amp <sup>R</sup> , lacI, His <sub>6</sub> -smt3 tag                                                                                                           | [6]       |
| pET11a_xind01729   | pBR322 ori, P <sub>T7</sub> promoter, Amp <sup>R</sup> , lacI, <i>xind01729</i> , strep tag                                                                                                         | This work |
| pFF1               | 2 $\mu$ ori, kanMX4, P <sub>BAD</sub> promoter, pCOLA ori, Ypet-Flag, Kan <sup>R</sup> , MCS                                                                                                        | [7]       |
| pFF1_NRPS_5*       | 2 $\mu$ ori, kanMX4, P <sub>BAD</sub> promoter, pCOLA ori, Ypet-Flag, Kan <sup>R</sup> , <i>bicA</i> -A1T1C2_gxpS-A2T2C3A3T3C4A4T4C <sub>Dsub</sub> 5_bicA-C <sub>Asub</sub> 5A5T5C <sub>term</sub> | [4]       |
| pCEP-Kan           | R6K $\gamma$ ori, oriT, Kan <sup>R</sup> , araC, P <sub>BAD</sub> promoter                                                                                                                          | [8]       |
| pCEP-Kan_xind01729 | R6K $\gamma$ ori, oriT, Kan <sup>R</sup> , araC, P <sub>BAD</sub> promoter, <i>xind01729</i> (bp 1-700)                                                                                             | This work |
| pAT41_NRPS-1       | 2 $\mu$ ori, URA3, P <sub>BAD</sub> promoter, pCOLA ori, Ypet-Flag, Kan <sup>R</sup> , <i>gxpS_A1T2-xind01729_R</i>                                                                                 | This work |
| pAT41_NRPS-2       | 2 $\mu$ ori, URA3, P <sub>BAD</sub> promoter, pCOLA ori, Ypet-Flag, Kan <sup>R</sup> , <i>gxpS_A1T2CE2A2T2-xind01729_R</i>                                                                          | This work |
| pAT41_NRPS-3       | 2 $\mu$ ori, URA3, P <sub>BAD</sub> promoter, pCOLA ori, Ypet-Flag, Kan <sup>R</sup> , <i>gxpS_A1T2-xtvB_R</i>                                                                                      | This work |
| pAT41_NRPS-4       | 2 $\mu$ ori, URA3, P <sub>BAD</sub> promoter, pCOLA ori, Ypet-Flag, Kan <sup>R</sup> , <i>gxpS_A1T2CE2A2T2-xtvB_R</i>                                                                               | This work |
| pAT41_NRPS-5       | 2 $\mu$ ori, URA3, P <sub>BAD</sub> promoter, pCOLA ori, Ypet-Flag, Kan <sup>R</sup> , <i>gxpS_A1T2CE2A2-xtvB_T2R</i>                                                                               | This work |
| pAT41_NRPS-6       | 2 $\mu$ ori, URA3, P <sub>BAD</sub> promoter, pCOLA ori, Ypet-Flag, Kan <sup>R</sup> , <i>gxpS_A1T2CE2A2T2-sacC_R</i>                                                                               | This work |
| pAT41_NRPS-7       | 2 $\mu$ ori, URA3, P <sub>BAD</sub> promoter, pCOLA ori, Ypet-Flag, Kan <sup>R</sup> , <i>gxpS_A1T2CE2A2T2-ausA_R</i>                                                                               | This work |
| pAT41_NRPS-8       | 2 $\mu$ ori, URA3, P <sub>BAD</sub> promoter, pCOLA ori, Ypet-Flag, Kan <sup>R</sup> , <i>bicA_A1T2CE2-gxpS_A2T2-xtvB_R</i>                                                                         | This work |

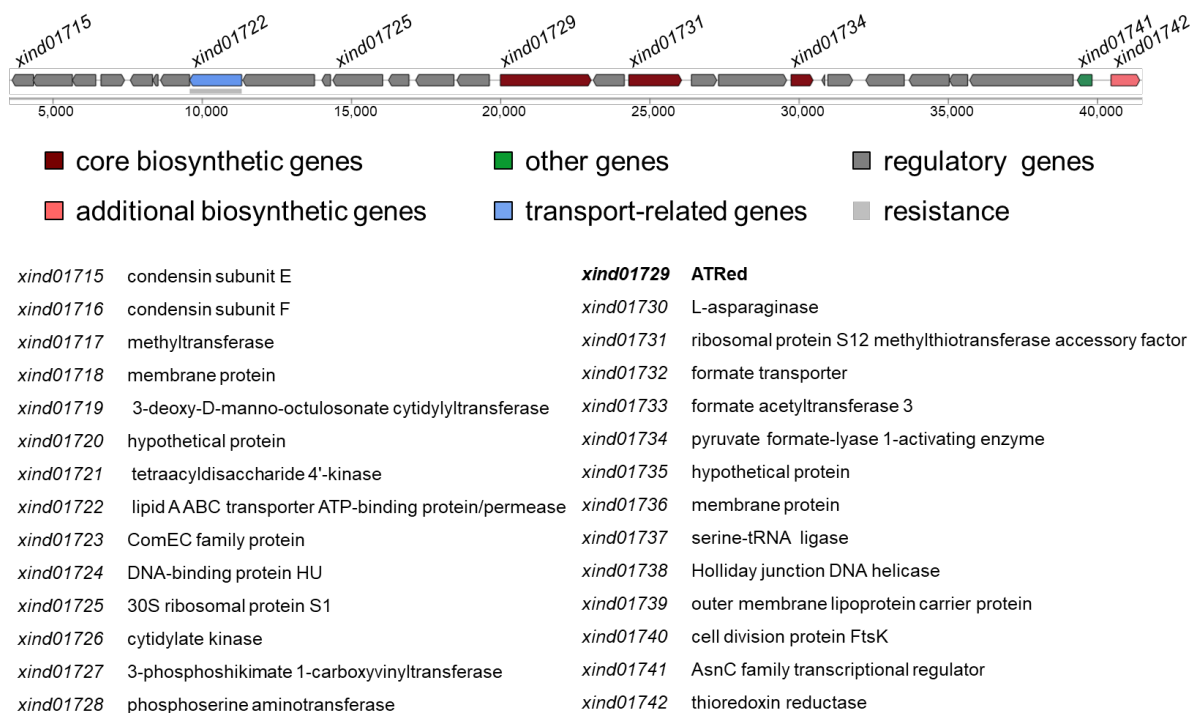

**Supplementary Figure 1.** Genomic region of *X. indica* DSM 17382 containing the ATRed encoding gene *xind01729*. The gene annotations and details are according to antiSMASH 5.1.2.<sup>[9]</sup>

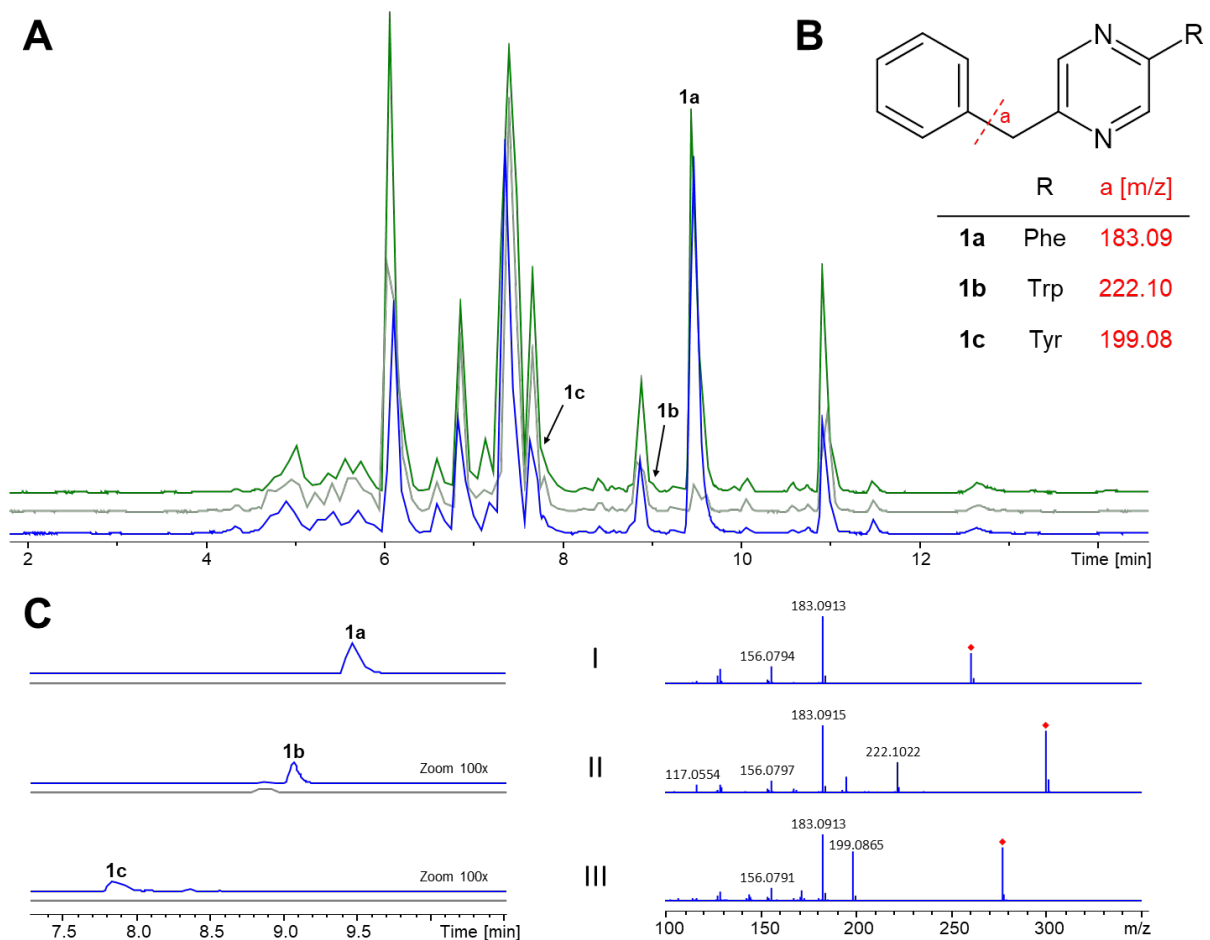

**Supplementary Figure 2.** HR-HPLC-MS data of **1a**, **1b** and **1c** produced by *X. indica* WT and promoter exchange mutant of *xind01729*. **(A)** Stacked BPC of production from *X. indica* WT (green) and promoter exchange mutant of *xind01729* (grey, non-induced; blue, induced). **(B)** Structure of **1a**, **1b** and **1c** and MS<sup>2</sup> fragments (red). **(C)** Stacked EIC (left) and MS<sup>2</sup> spectra (right) of **1a** (I, rt = 9.5 min,  $m/z$   $[M+H]^+$  = 261.138; calculated ion formula C<sub>18</sub>H<sub>17</sub>N<sub>2</sub>; Δppm 1.4), **1b** (II, rt = 9.1 min,  $m/z$   $[M+H]^+$  = 300.149; calculated ion formula C<sub>20</sub>H<sub>18</sub>N<sub>3</sub>; Δppm -0.3) and **1c** (III, rt = 7.9 min,  $m/z$   $[M+H]^+$  = 277.130; calculated ion formula C<sub>18</sub>H<sub>17</sub>N<sub>2</sub>O; Δppm 0.5)

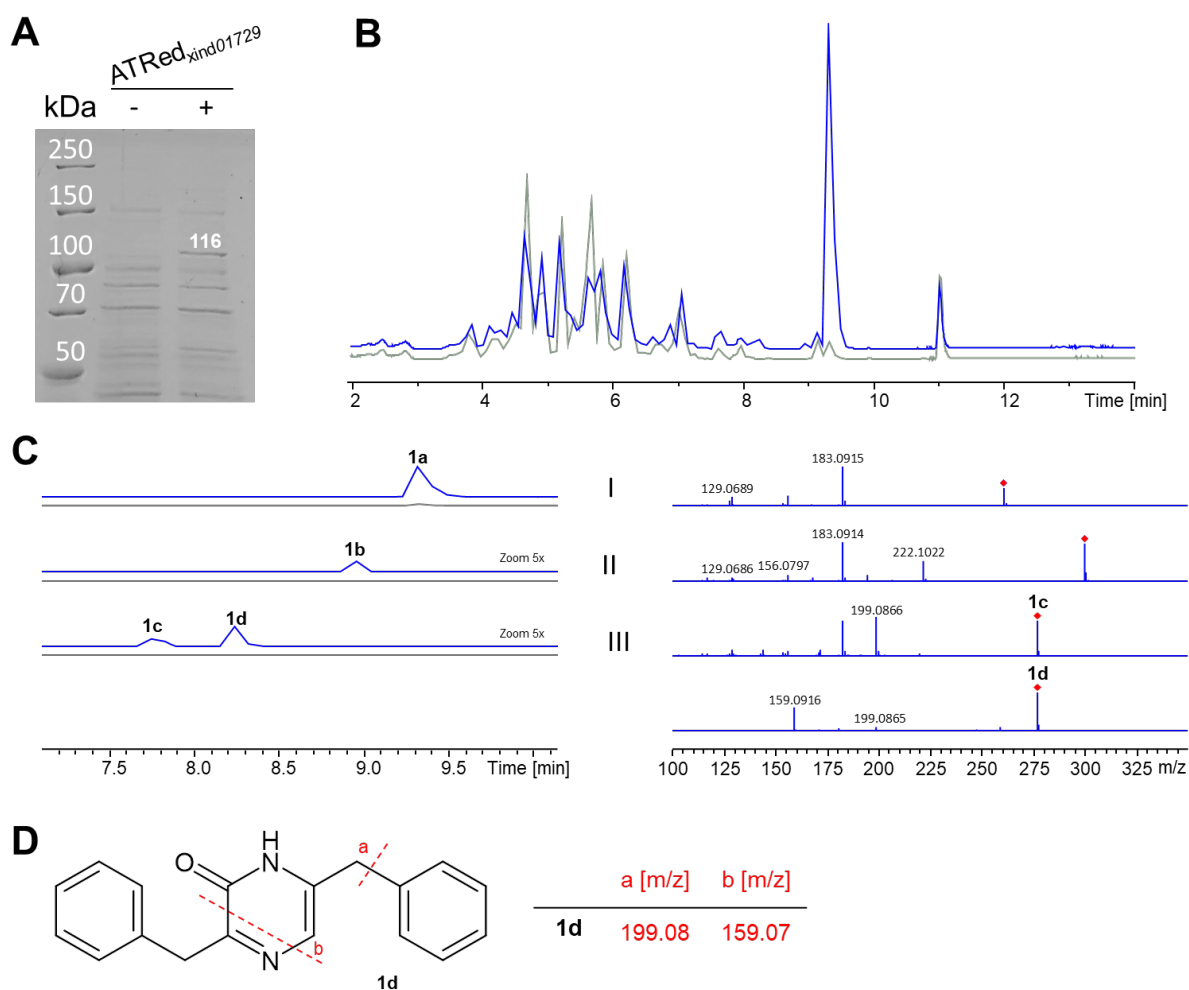

**Supplementary Figure 3.** HR-HPLC-MS data of **1a**, **1b**, **1c** and **1d** produced by ATRed<sub>xind01729</sub> after heterologous expression in *E. coli*. **(A)** SDS-PAGE analysis of protein extracts of non-induced (-) and induced (+) sample. The calculated molecular weights of the protein and the size of the marker proteins are indicated. **(B)** Stacked BPC of non-induced (grey) and induced (blue) production from ATRed<sub>xind01729</sub>. **(C)** Stacked EIC (left) and MS<sup>2</sup> spectra (right) of **1a** (I, rt = 9.4 min,  $m/z$   $[M+H]^+$  = 261.138; calculated ion formula C<sub>18</sub>H<sub>17</sub>N<sub>2</sub>;  $\Delta$ ppm 1.0), **1b** (II, rt = 9.0 min,  $m/z$   $[M+H]^+$  = 300.149; calculated ion formula C<sub>20</sub>H<sub>18</sub>N<sub>3</sub>;  $\Delta$ ppm 1.3), **1c** (III, rt = 7.8 min,  $m/z$   $[M+H]^+$  = 277.133; calculated ion formula C<sub>18</sub>H<sub>17</sub>N<sub>2</sub>O;  $\Delta$ ppm 0.0) and **1d** (III, rt = 8.3 min,  $m/z$   $[M+H]^+$  = 277.133; calculated ion formula C<sub>18</sub>H<sub>17</sub>N<sub>2</sub>O;  $\Delta$ ppm 0.8). **(D)** Postulated structure of **1d** and MS<sup>2</sup> fragments (red).

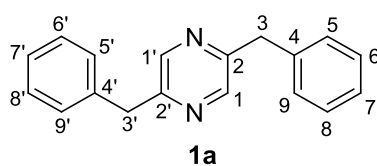

**Supplementary Figure 4.** Structure of compound **1a**.



**Supplementary Table 4.**  $^1\text{H}$  (500 MHz) and  $^{13}\text{C}$  (125 MHz) NMR spectroscopic data for compound **1a** in  $\text{DMSO-}d_6$  ( $\delta$  in ppm and  $J$  in Hz ).

| no.          | <b>1a</b>           |                                   |
|--------------|---------------------|-----------------------------------|
|              | $\delta_{\text{C}}$ | $\delta_{\text{H}}$ (mult., $J$ ) |
| 1, 1'        | 143.7               | 8.30 (s)                          |
| 2, 2'        | 153.7               |                                   |
| 3, 3'        | 41.6                | 4.05 (s)                          |
| 4, 4'        | 138.4               |                                   |
| 5, 5', 9, 9' | 129.0               | 7.18 (m)                          |
| 6, 6', 8, 8' | 128.8               | 7.22 (m)                          |
| 7, 7'        | 126.7               | 7.15 (m)                          |

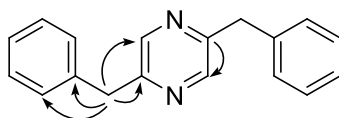

HMBC  $\text{H} \rightarrow \text{C}$

**Supplementary Figure 5.** Key HMBC correlations of **1a**.

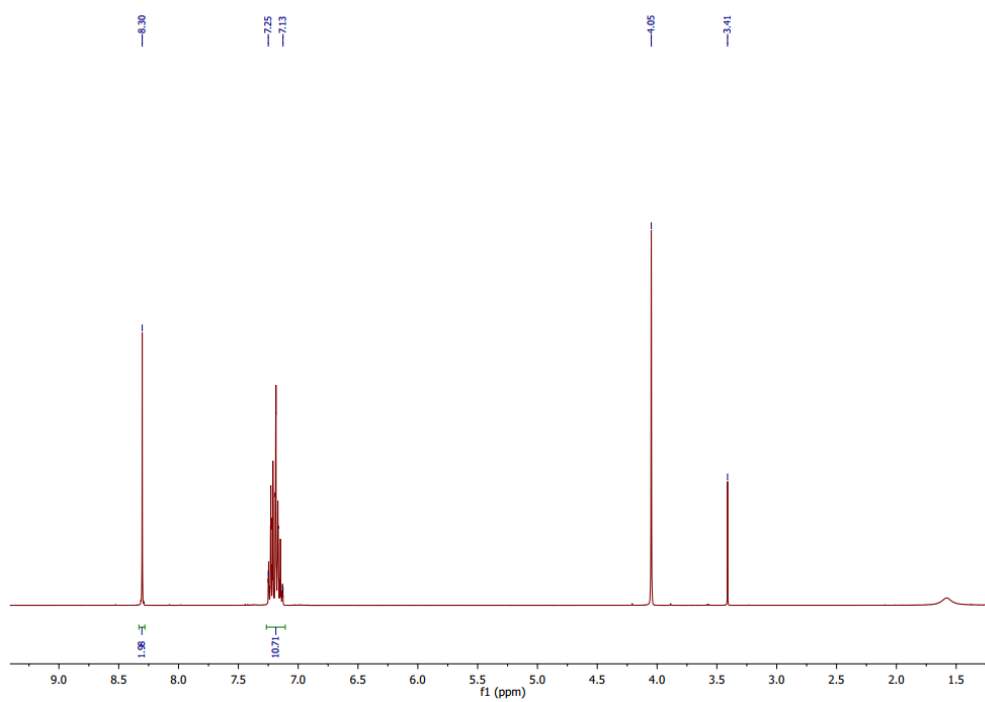

**Supplementary Figure 6.**  $^1\text{H}$  NMR spectrum of compound **1a**.

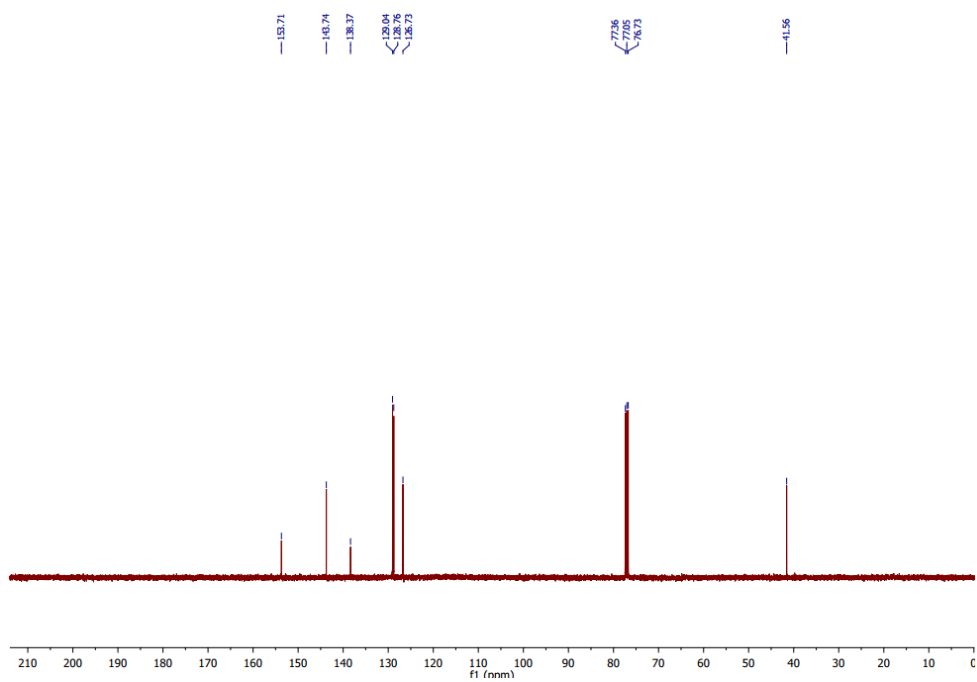

Supplementary Figure 7.  $^{13}\text{C}$  NMR spectrum of compound **1a**.

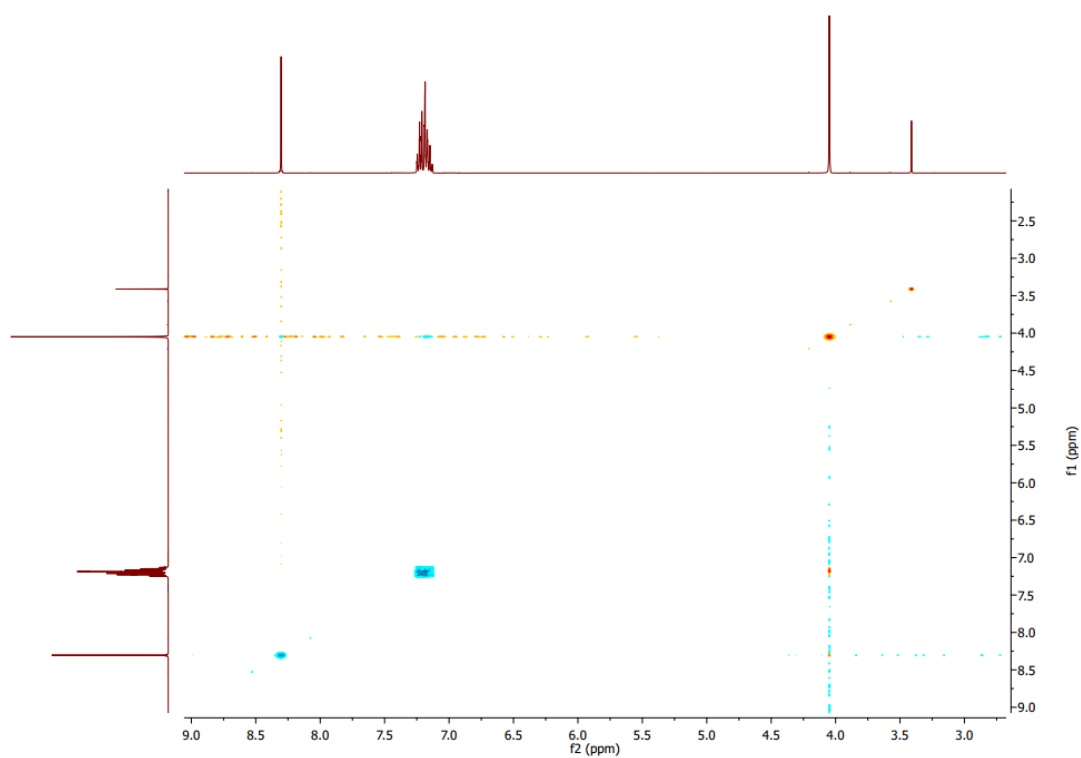

Supplementary Figure 8. COSY spectrum of compound **1a**.

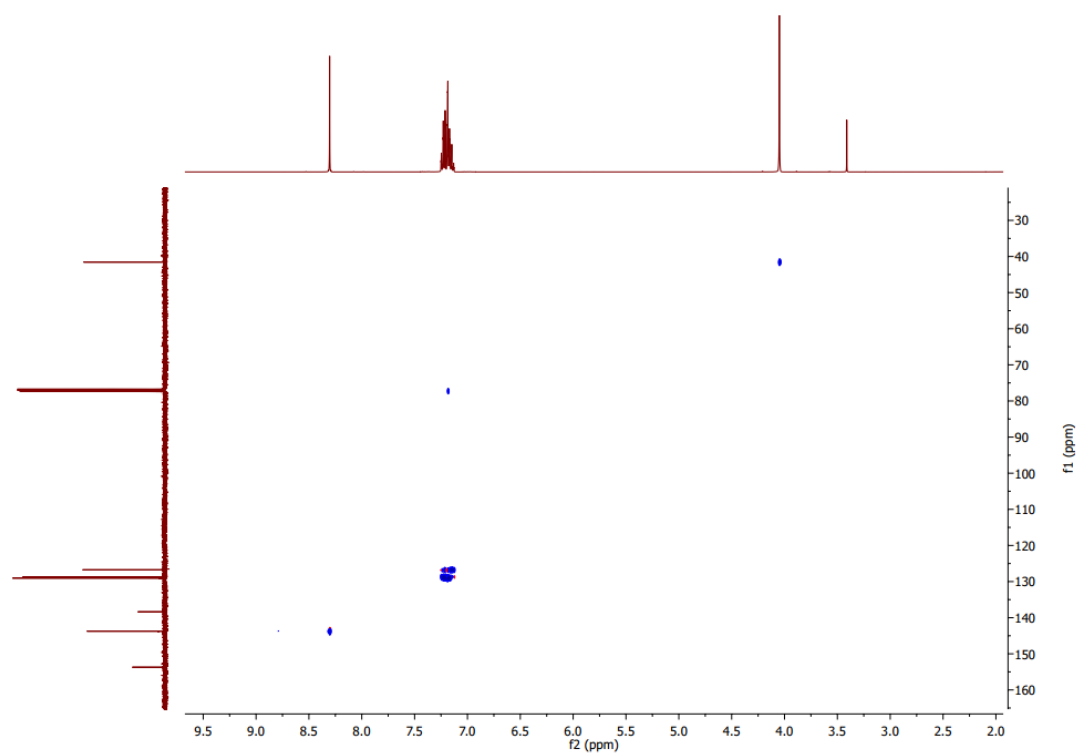

**Supplementary Figure 9. HSQC spectrum of compound 1a.**

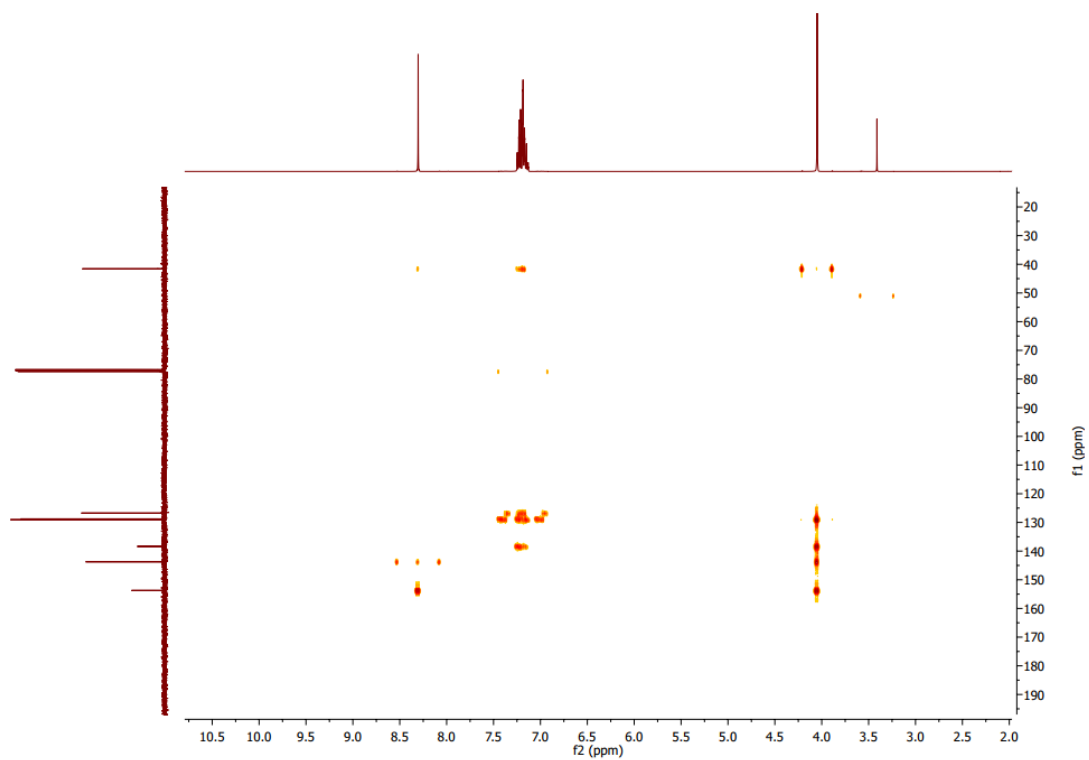

**Supplementary Figure 10. HMBC spectrum of compound 1a.**

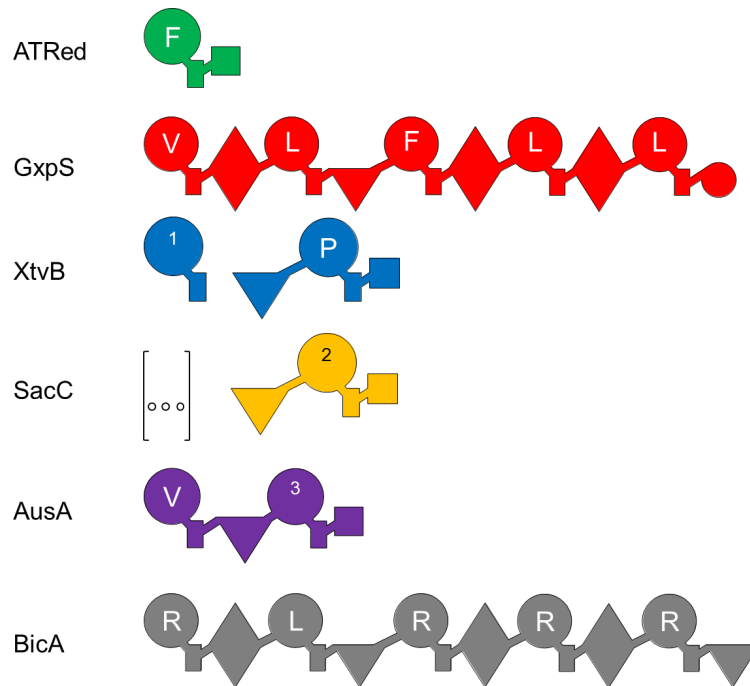

**Supplementary Figure 11.** Schematic overview of all NRPSs used in this work. ATRed<sub>xind01729</sub> from *X. indica* (WP\_047678938), GxpS from *P. laumondii* subsp. *laumondii* TT01<sup>[10]</sup>, XtvB from *X. eapokensis* DL20<sup>[11]</sup>, SacC from *Xenorhabdus* sp. TS4 (PRJNA328577), AusA from *S. lugdunensis* (WP\_012990658) and BicA from *X. budapestensis*<sup>[12]</sup>. Substrate specificities are assigned for all A domains with (1) as 3-hydroxy anthranilic acid, (2) as 3-hydroxy-5-methyl-O-methyltyrosine (3) as leucine, tyrosine, phenylalanine, 4-fluoro-phenylalanine, 4-chloro-phenylalanine, 3-chloro-tyrosine and (S)-(+)-a-amino-cyclohexane propionic acid. See Fig. 1 and 2 for assignment of the domain symbols.

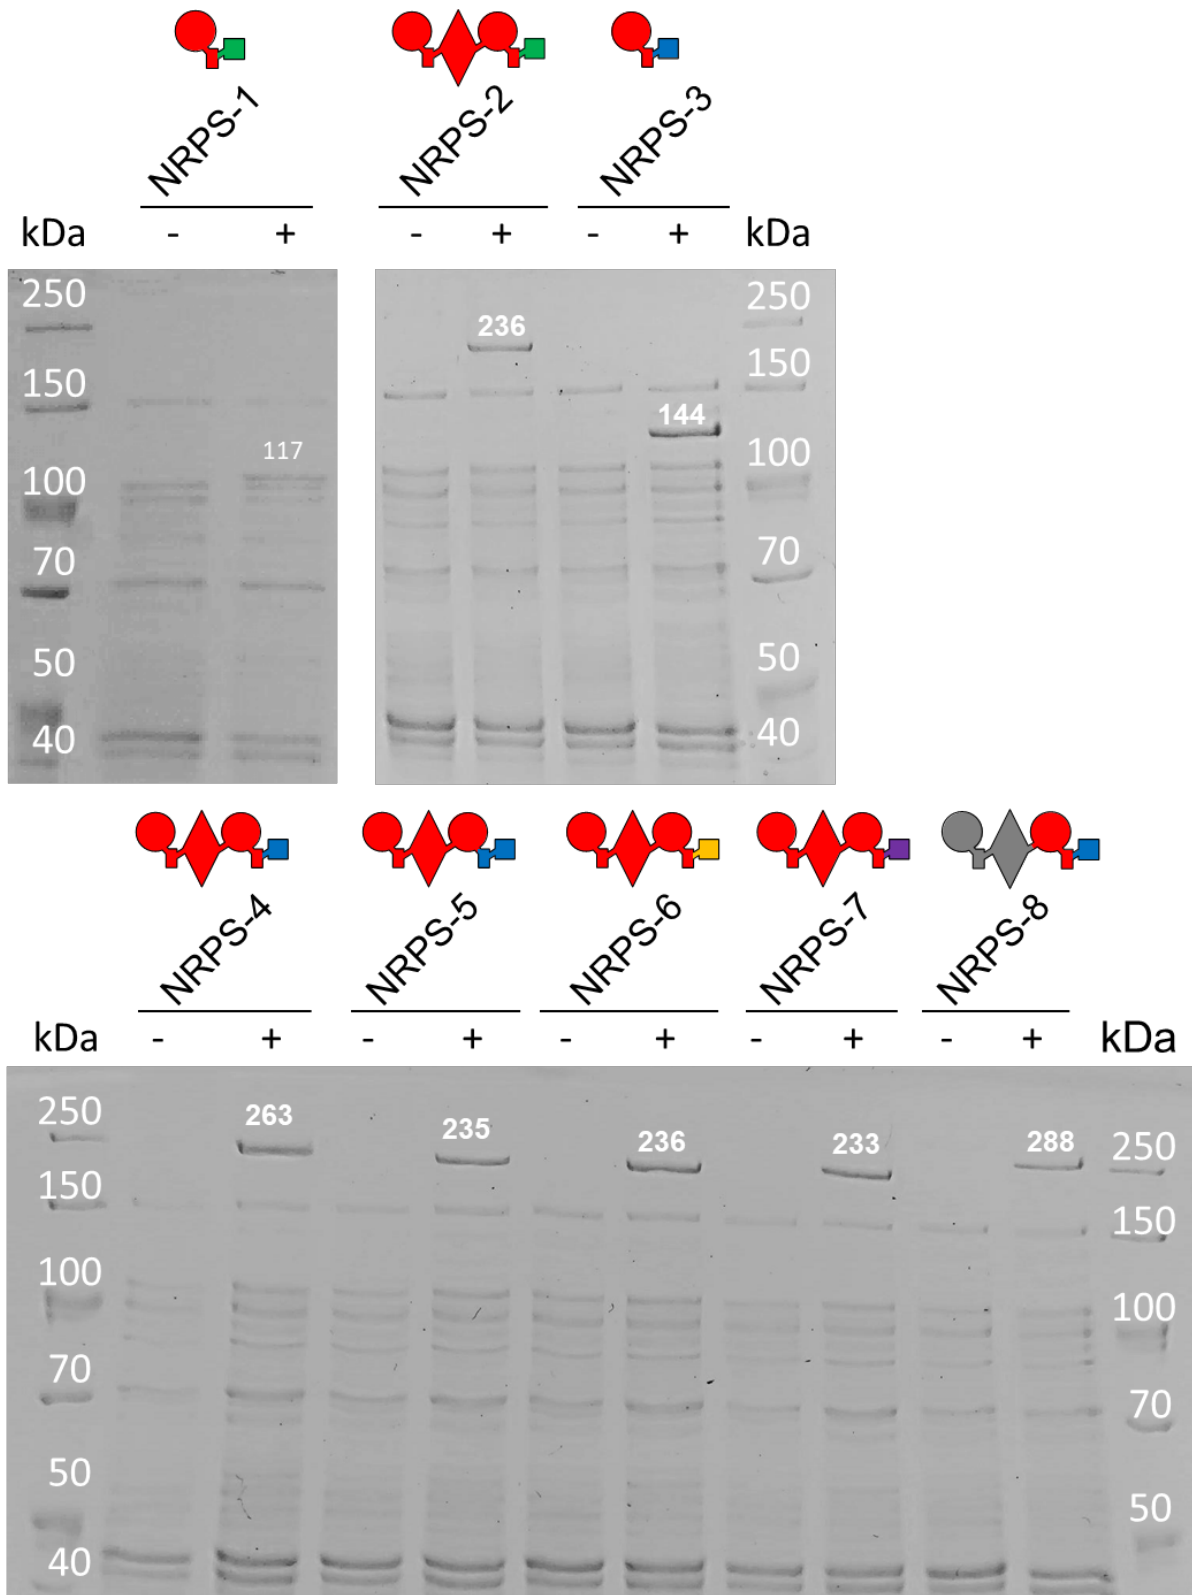

**Supplementary Figure 12.** SDS-PAGE analysis of engineered proteins. Culture extracts of *E. coli* cells with the respective plasmids after induction with (+) or without arabinose induction (-). The calculated molecular weights of the proteins and the size of the marker proteins are indicated. See Fig. 1 and 2 for assignment of the domain symbols. The colour identifies NRPSs used as building blocks (Supplementary Fig 9).

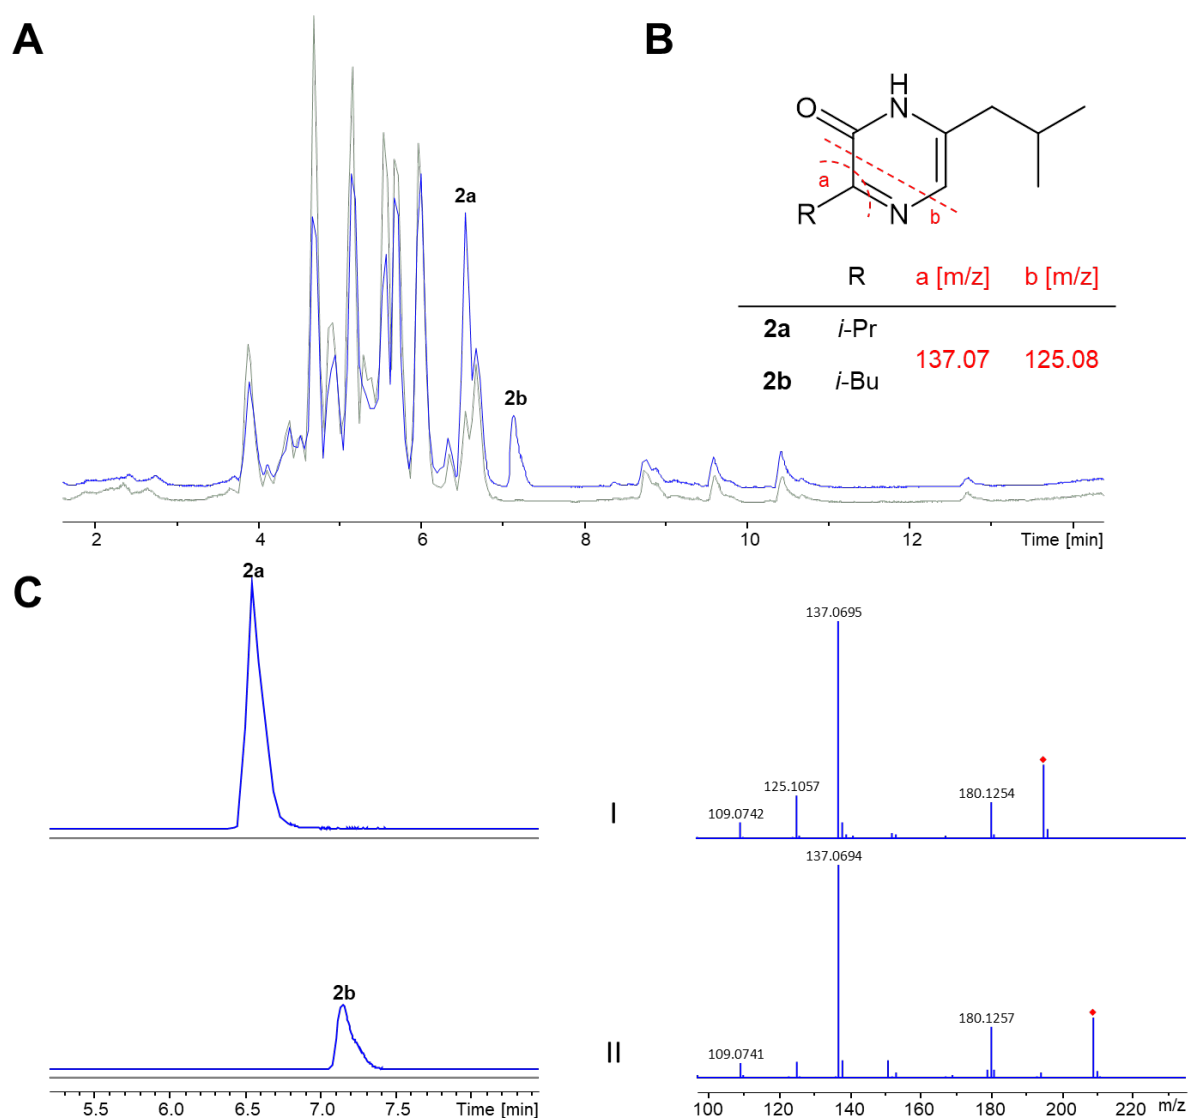

**Supplementary Figure 13.** HR-HPLC-MS data of **2a** and **2b** produced by NRPS-4 after heterologous expression in *E. coli* DH10B::*mtaA*. **(A)** Stacked BPC of non-induced (grey) and induced (blue) production from NRPS-4. **(B)** Structure of **2a** and **2b** and MS<sup>2</sup> fragments (red). **(C)** Stacked EIC (left) and MS<sup>2</sup> spectra (right) of **2a** (I, rt = 6.6 min,  $m/z$   $[M+H]^+$  = 195.149; calculated ion formula C<sub>11</sub>H<sub>19</sub>N<sub>2</sub>O;  $\Delta$ ppm 1.0) and **2b** (II, rt = 7.2 min,  $m/z$   $[M+H]^+$  = 209.164; calculated ion formula C<sub>12</sub>H<sub>21</sub>N<sub>2</sub>O;  $\Delta$ ppm 1.6).

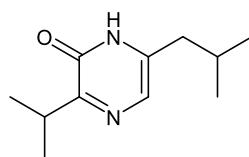

**Supplementary Figure 14.** Structure of compound **2a**.

**Supplementary Table 5.**  $^1\text{H}$  (500 MHz) and  $^{13}\text{C}$  (125 MHz) NMR spectroscopic data for compound **2a** in  $\text{DMSO-}d_6$  ( $\delta$  in ppm and  $J$  in Hz ).

| no. | <b>2a</b>           |                                   |
|-----|---------------------|-----------------------------------|
|     | $\delta_{\text{C}}$ | $\delta_{\text{H}}$ (mult., $J$ ) |
| 1   | 160.5               |                                   |
| 2   | 156.2               |                                   |
| 3   | 121.4               | 7.05 (s)                          |
| 4   | 138.4               |                                   |
| 5   | 38.8                | 2.26 (d, 7.3)                     |
| 6   | 28.0                | 1.92 (m)                          |
| 7   | 22.4                | 1.11 (d, 6.9)                     |
| 8   | 22.4                | 1.11 (d, 6.9)                     |
| 1'  | 29.7                | 3.24 (m)                          |
| 2'  | 17.6                | 0.86 (d, 6.6)                     |
| 3'  | 17.6                | 0.86 (d, 6.6)                     |

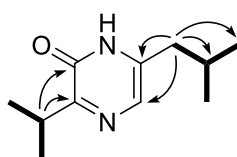

HMBC H  $\rightarrow$  C  
COSY H  $\rightarrow$  H

**Supplementary Figure 15.** Key HMBC and COSY correlations of **2a**.

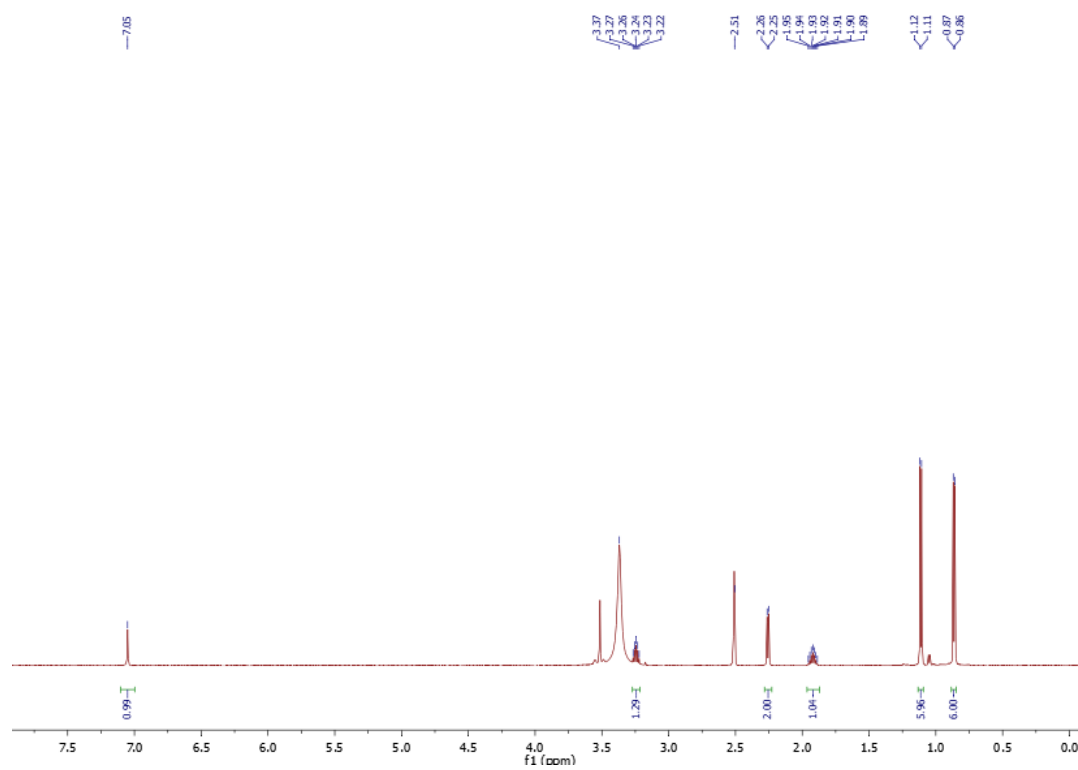

Supplementary Figure 16.  $^1\text{H}$  NMR spectrum of compound **2a**.

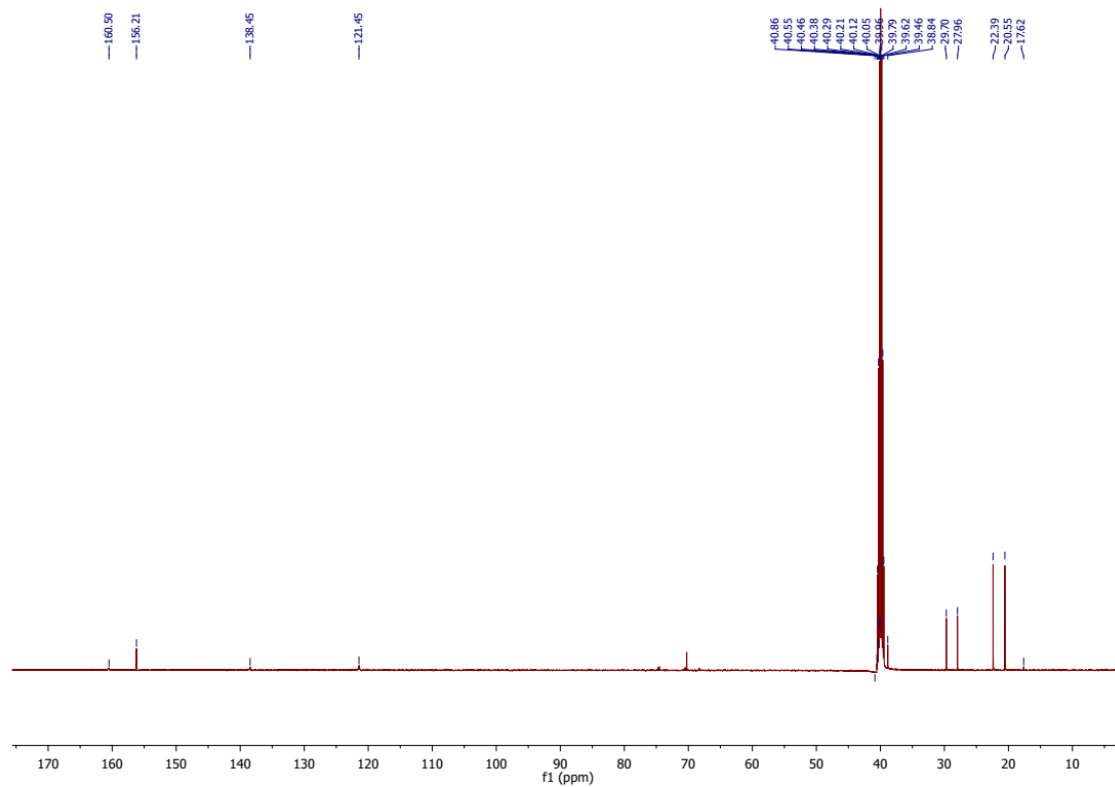

Supplementary Figure 17.  $^{13}\text{C}$  NMR spectrum of compound **2a**.



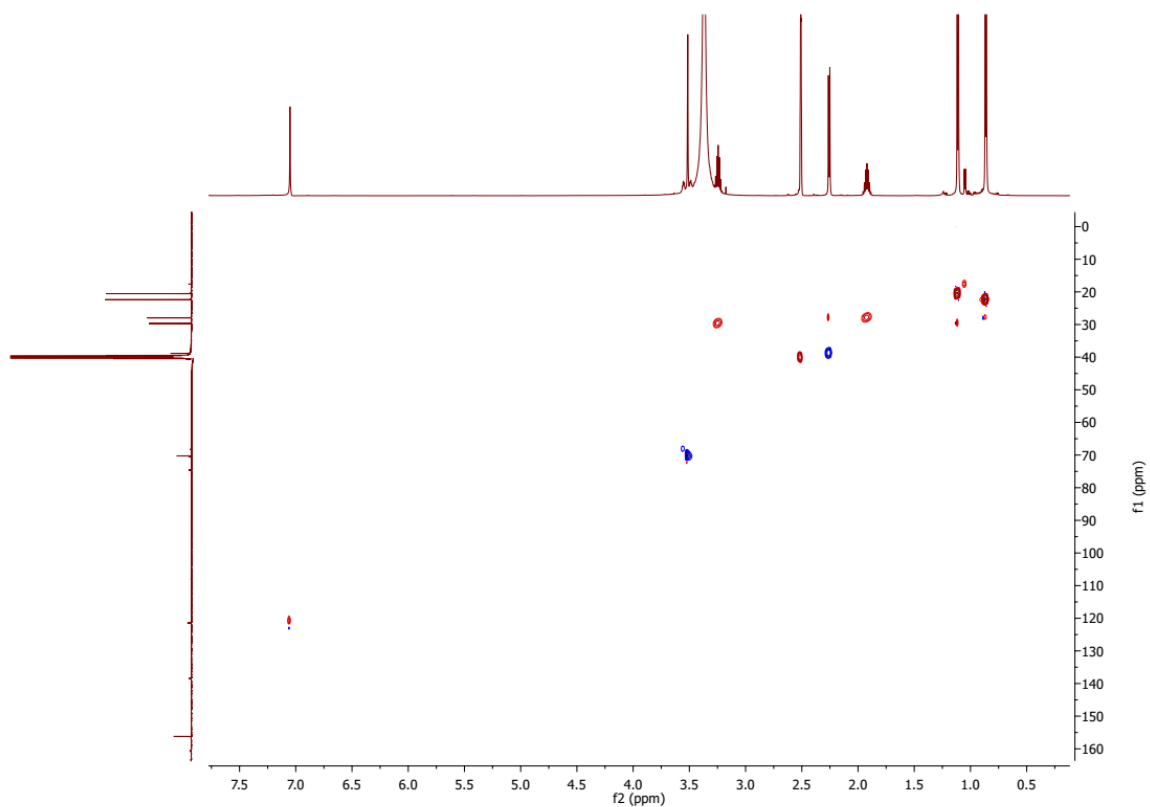

**Supplementary Figure 18.** HSQC spectrum of compound **2a**.

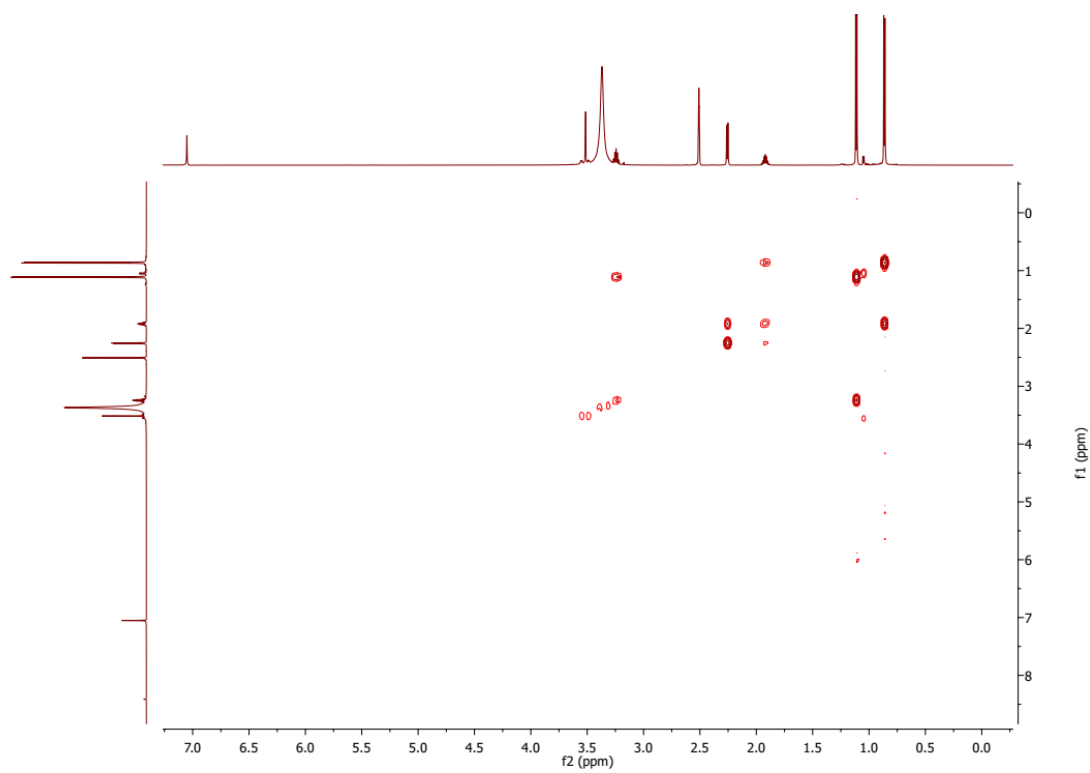

**Supplementary Figure 19.** COSY spectrum of compound **2a**.

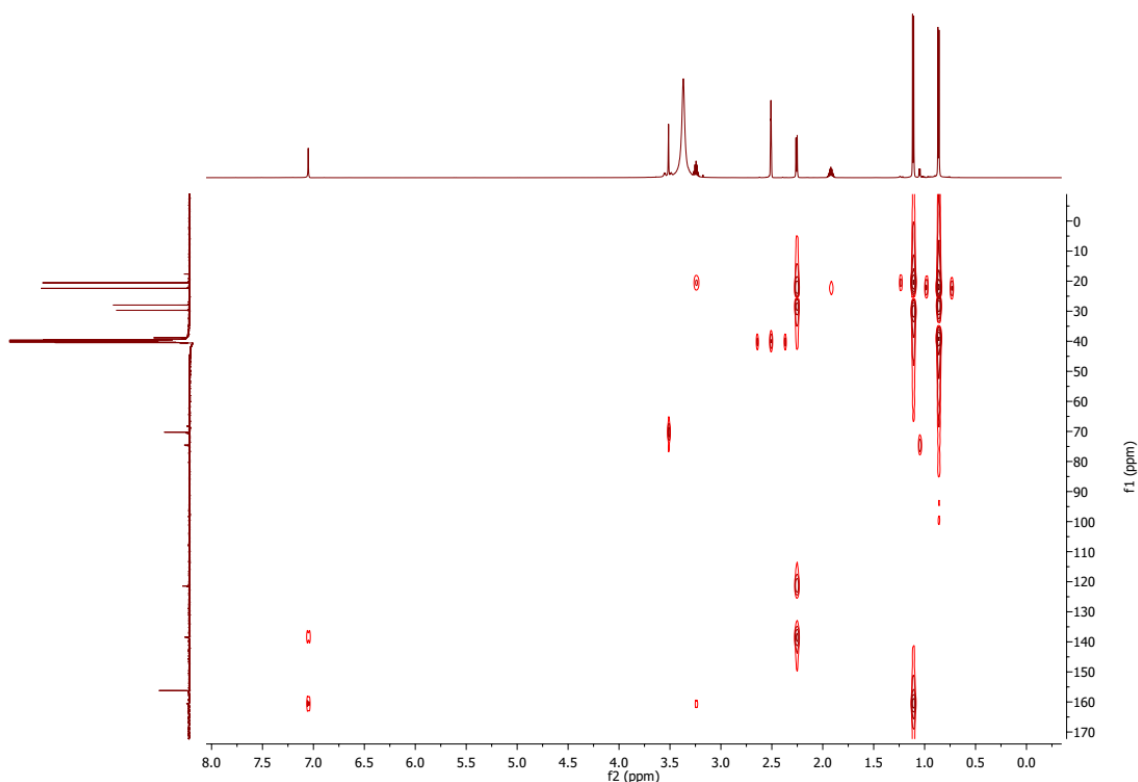

**Supplementary Figure 20.** HMBC spectrum of compound **2a**.

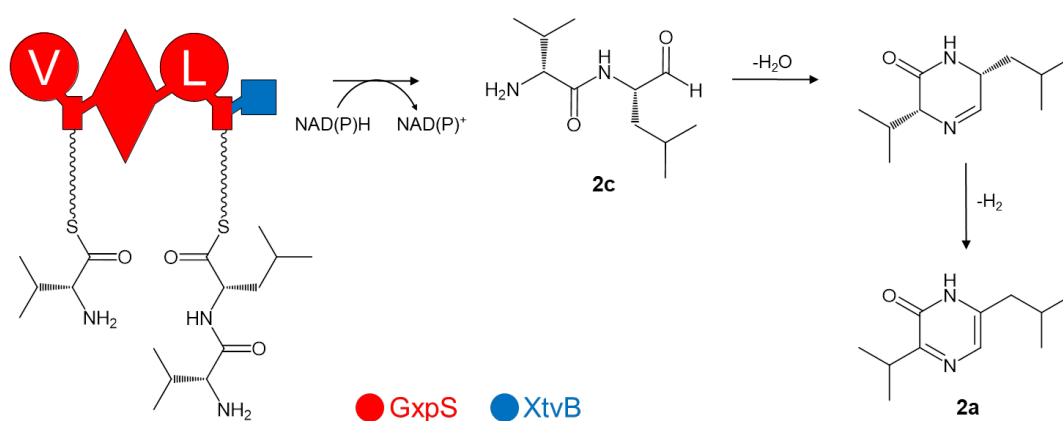

**Supplementary Figure 21.** Biosynthesis of **2a** by NRPS-4. Standard NRPS biochemistry attaches the nascent D-Val-L-Leu dipeptide on the T2 domain which is released by the R domain via an NAD(P)H-dependent 2-electron reduction of the thioester to produce **2c**. Intramolecular nucleophilic attack of the amino group onto the aldehyde generates a 6-membered Schiff base which oxidizes to yield **2a**. The relaxed substrate specificity of GxpS\_A1 can also incorporate Leu beside Val leading to **2b**. See Fig. 1 and 2 for assignment of the domain symbols. The colour code at the bottom identifies NRPSs used as building blocks (Supplementary Fig 9).

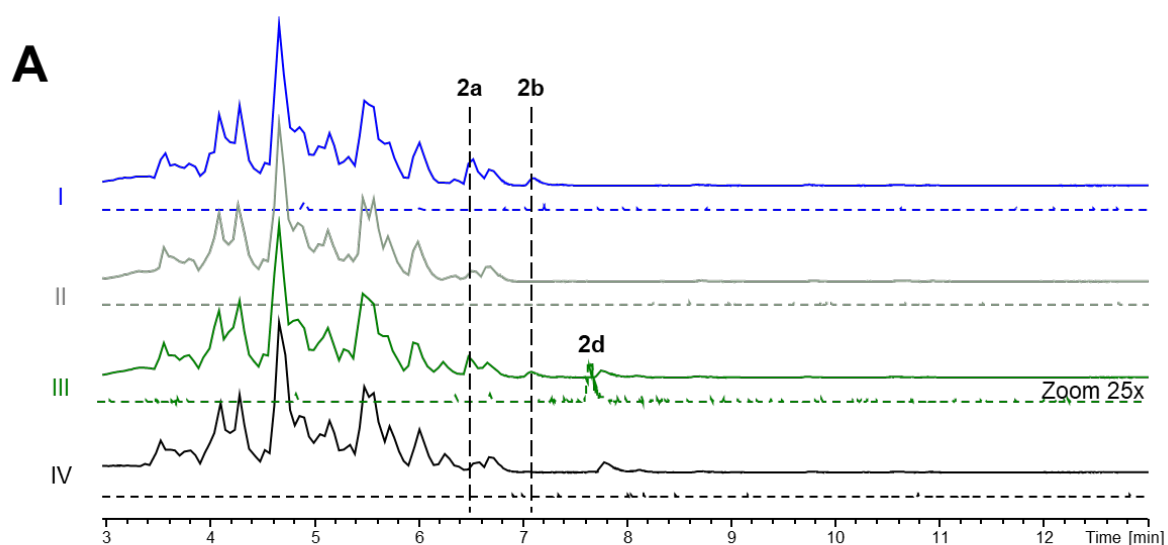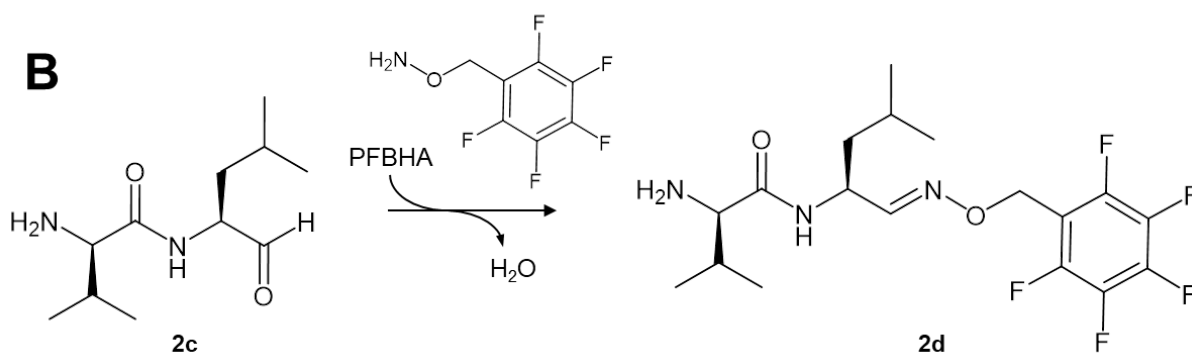

**Supplementary Figure 22. (A)** HR-HPLC-MS data of **2a** and **2b** as well as derivatization product **2d** of intermediate **2c** produced by NRPS-4 after heterologous production with PFBHA in *E. coli* DH10B::*mtaA*. (I) blue, induced, without PFBHA, (II) grey, non-induced without PFBHA, (III) green, induced with PFBHA and (IV) black, non-induced with PFBHA. The BPC is indicated by continuous lines and the EIC (**2d**;  $m/z [M+H]^+ = 410.186$ ;  $rt = 7.6$  min; calculated ion formula  $C_{18}H_{25}F_5N_3O_2$ ;  $\Delta ppm -1.9$ ) by dashed lines. The y-axes of the EICs are increased 25-fold compared to the BPCs. **(B)** Derivatisation of **2c** with PFBHA resulting in **2d**.

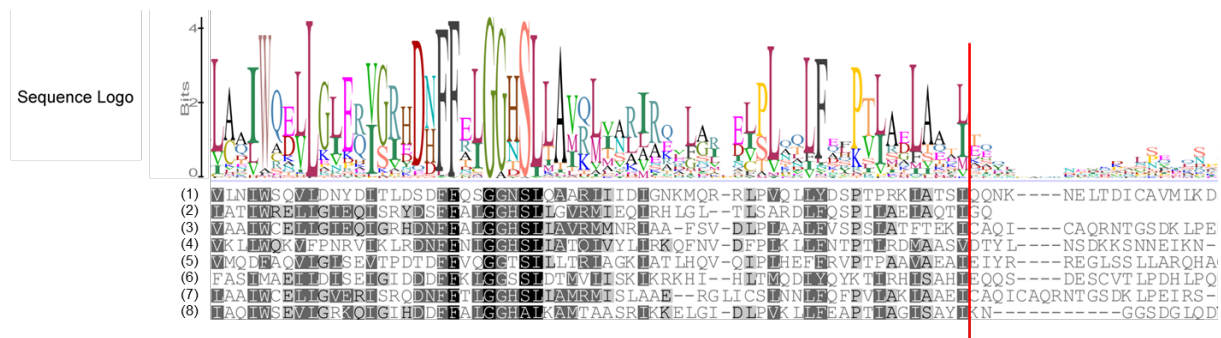

**Supplementary Figure 23.** Sequence logo and alignment of 86 NRPS T domains. Color code is due to their similarity (black, high similarity; white, low similarity). (1) ATRed\_T1 from *X. indica*, (2) GxpS\_T1 from *P. luminescens*, (3) GxpS\_T2 from *P. luminescens*, (4) XtvB\_T2 from *X. eapokensis*, (5) SacC\_T3 from *Xenorhabdus* sp. TS4, (6) AusA\_T2 from *S. lugdunensis*, (7) GxpS\_T5 from pFF1\_gxpS\_C2<sub>int</sub><sup>[7]</sup> and (8) SrfA-C from *B. subtilis*<sup>[13]</sup>. All sequences are from *Xenorhabdus* and *Photorhabdus* except (6) and (8). The fusion point of T and R domains is indicated by a red line. The data were analyzed with Geneious 6.1.7.

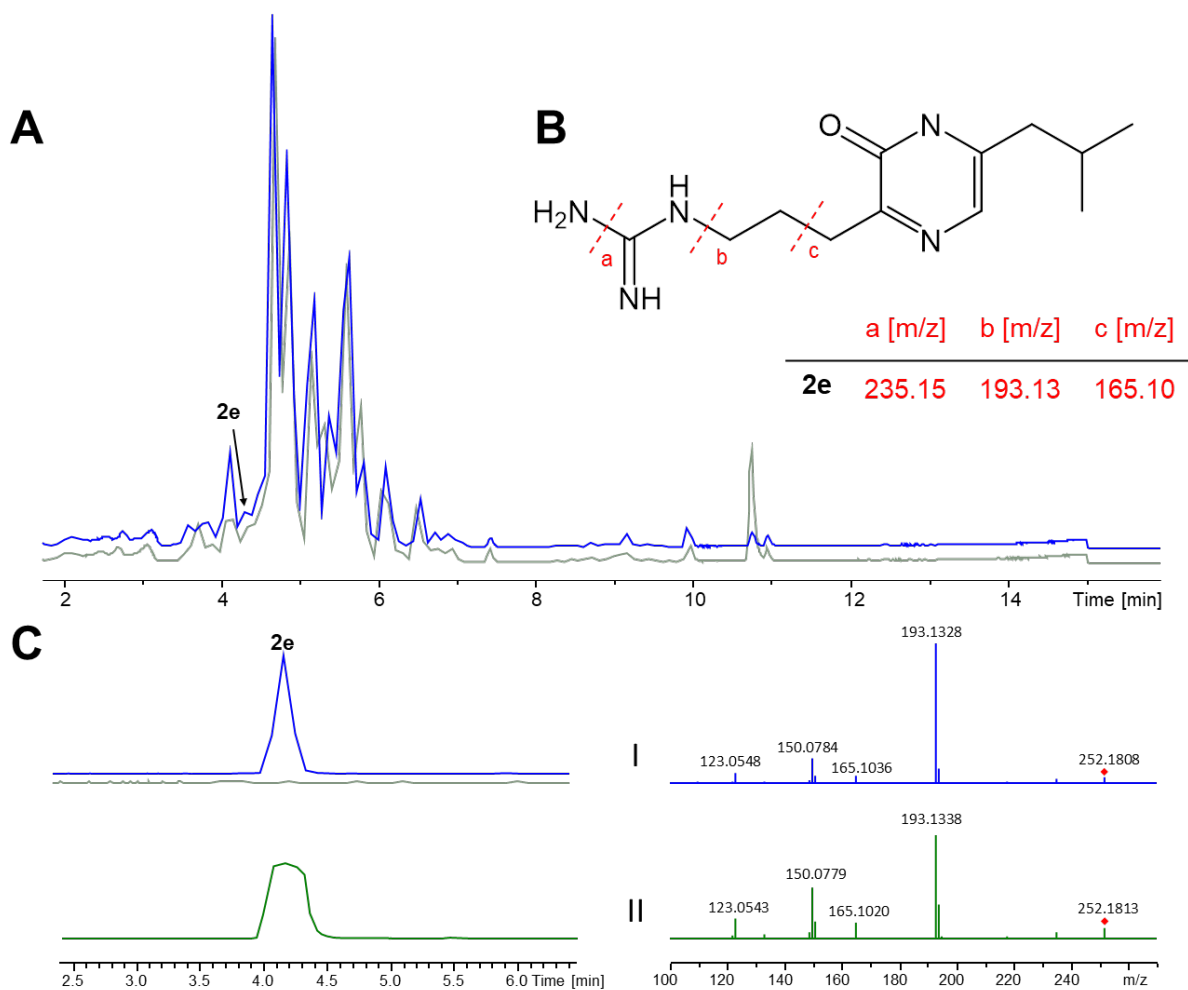

**Supplementary Figure 24.** HR-HPLC-MS data of compound **2e** produced by NRPS-8 after heterologous expression in *E. coli* DH10B::mtaA. **(A)** Stacked BPC of non-induced (grey) and induced (blue) production from NRPS-8. **(B)** Structure of **2e** and MS<sup>2</sup> fragments (red). **(C)** Stacked EIC (left) and MS<sup>2</sup> spectra (right) of **2e** (I, blue, rt = 4.2 min,  $m/z$   $[M+H]^+$  = 252.181; calculated ion formula C<sub>12</sub>H<sub>22</sub>N<sub>5</sub>O;  $\Delta$ ppm 1.3) and chemically synthesized **2e** (II, green, rt = 4.2 min,  $m/z$   $[M+H]^+$  = 252.181; calculated ion formula C<sub>12</sub>H<sub>22</sub>N<sub>5</sub>O;  $\Delta$ ppm 1.3)

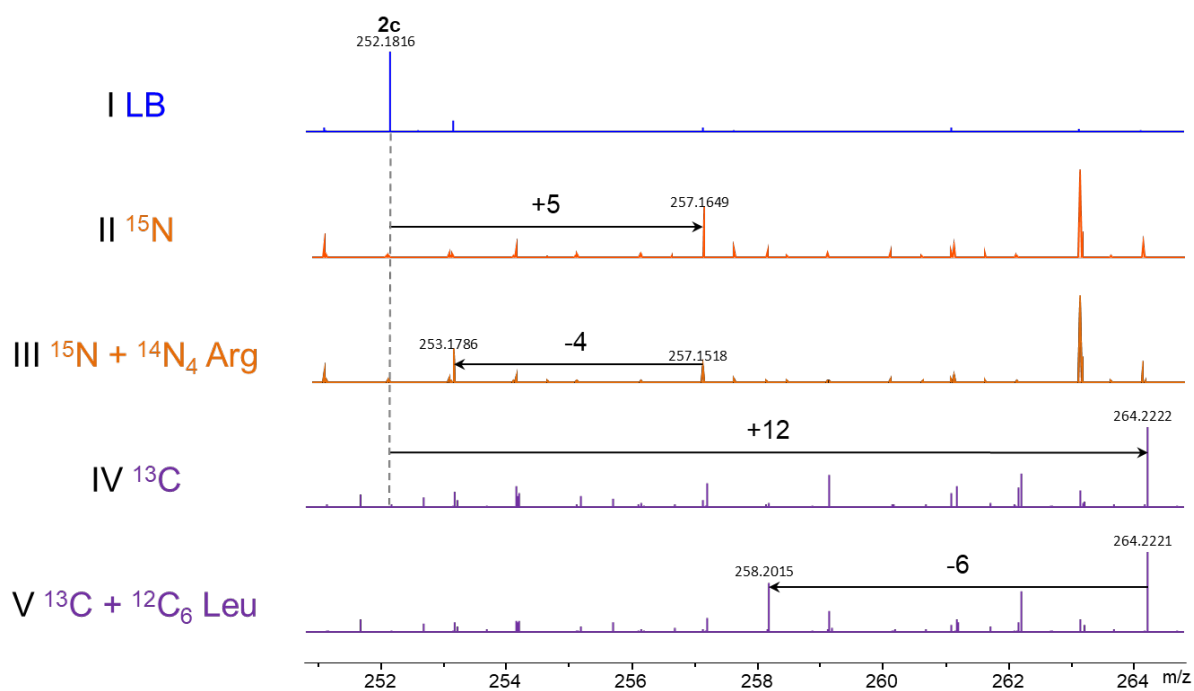

**Supplementary Figure 25.** Labeling experiments and HR-MS of compounds **2e** produced by NRPS-8 in *E. coli*. MS data of inverse labeling experiments in (I) LB media (blue), (II)  $^{15}\text{N}$  media (orange), (III)  $^{15}\text{N}$  media supplemented with  $^{14}\text{C}_4$  Arg (IV)  $^{13}\text{C}$  media (purple) and (V)  $^{13}\text{C}$  media supplemented with  $^{12}\text{C}_6$  Leu. The shifts due to incorporation of labelled precursors are indicated by arrows.

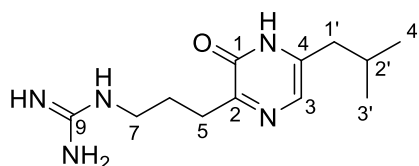

**Supplementary Figure 26.** Structure of compound **2e**.

**Supplementary Table 6.**  $^1\text{H}$  (500 MHz) and  $^{13}\text{C}$  (125 MHz) NMR spectroscopic data for compound **2e** in  $\text{DMSO-}d_6$  ( $\delta$  in ppm and  $J$  in Hz ).

| no.   | <b>2e</b>                  |                                   |
|-------|----------------------------|-----------------------------------|
|       | $\delta_{\text{C}}$ , type | $\delta_{\text{H}}$ (mult., $J$ ) |
| 1     | undetected                 |                                   |
| 2     | 156.2                      |                                   |
| 3     | 121.2                      | 7.05 (s)                          |
| 4     | 138.4                      |                                   |
| 5     | 29.3                       | 2.65 (t, 7.4)                     |
| 6     | 25.6                       | 1.82 (m)                          |
| 7     | 40.8                       | 3.16 (m)                          |
| 8     |                            | 7.50 (s)                          |
| 9     | 157.0                      |                                   |
| 1'    | 38.8                       | 2.28 (d, 7.2)                     |
| 2'    | 28.1                       | 1.93 (m)                          |
| 3'    | 22.4                       | 0.87 (d, 6.2)                     |
| 4'    | 22.4                       | 0.87 (d, 6.2)                     |
| -NHCO |                            | 12.1 (s)                          |

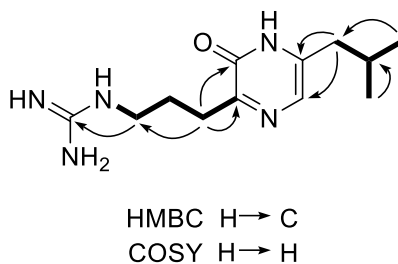

**Supplementary Figure 27.** Key HMBC and COSY correlations of **2e**.

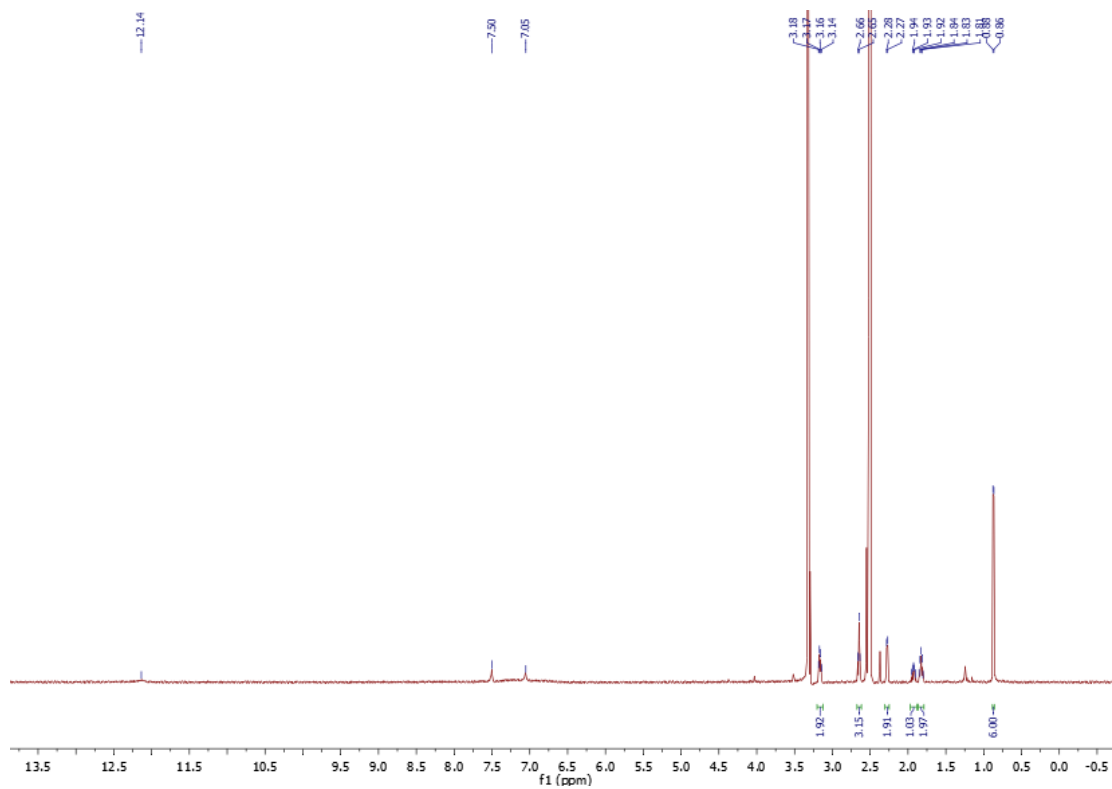

Supplementary Figure 28. <sup>1</sup>H NMR spectrum of synthesized **2e**.

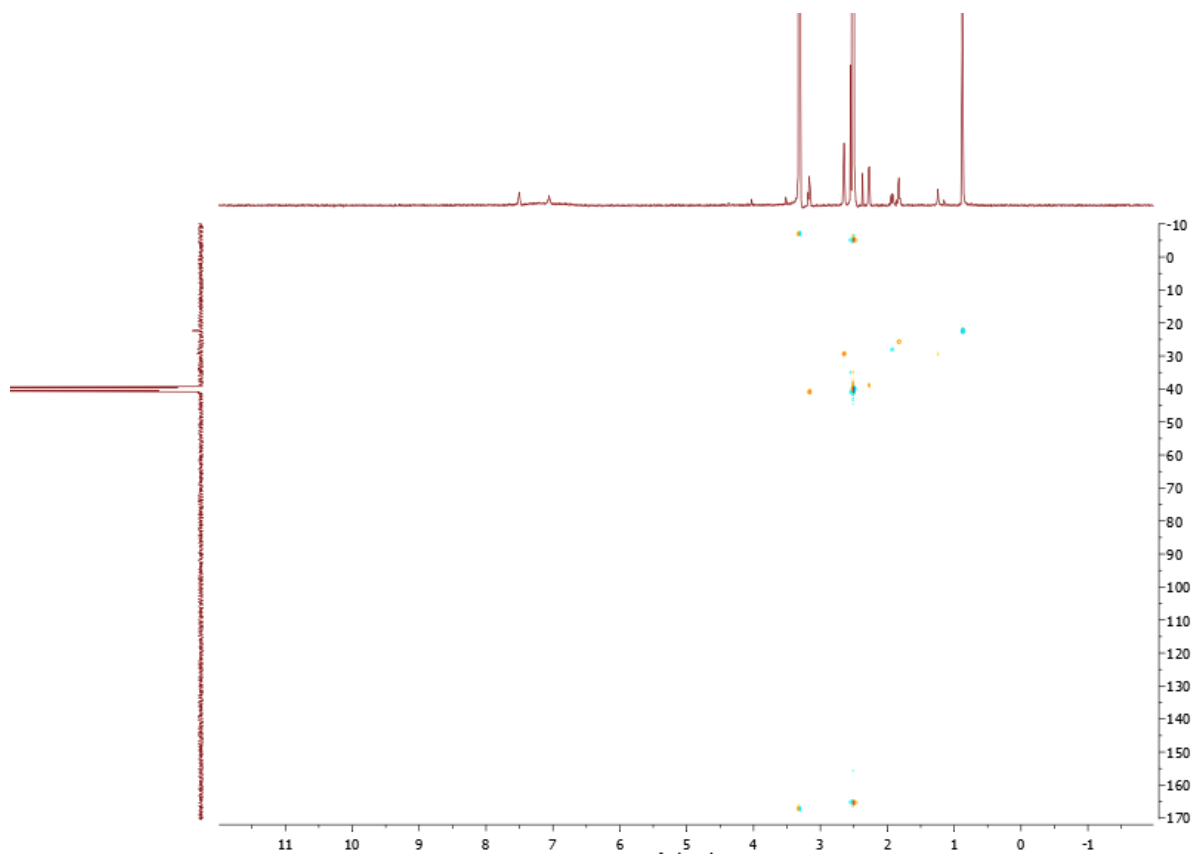

Supplementary Figure 29. HSQC NMR spectrum of synthesized **2e**.



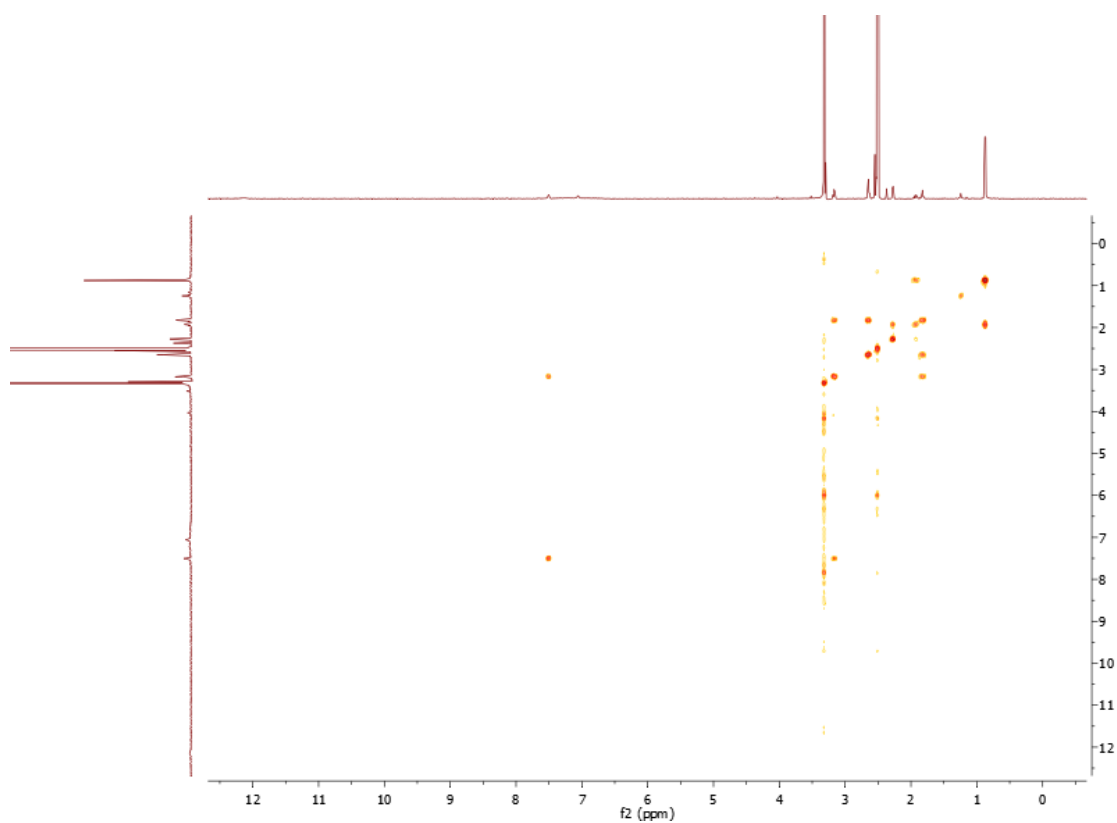

**Supplementary Figure 30.** COSY NMR spectrum of synthesized **2e**.

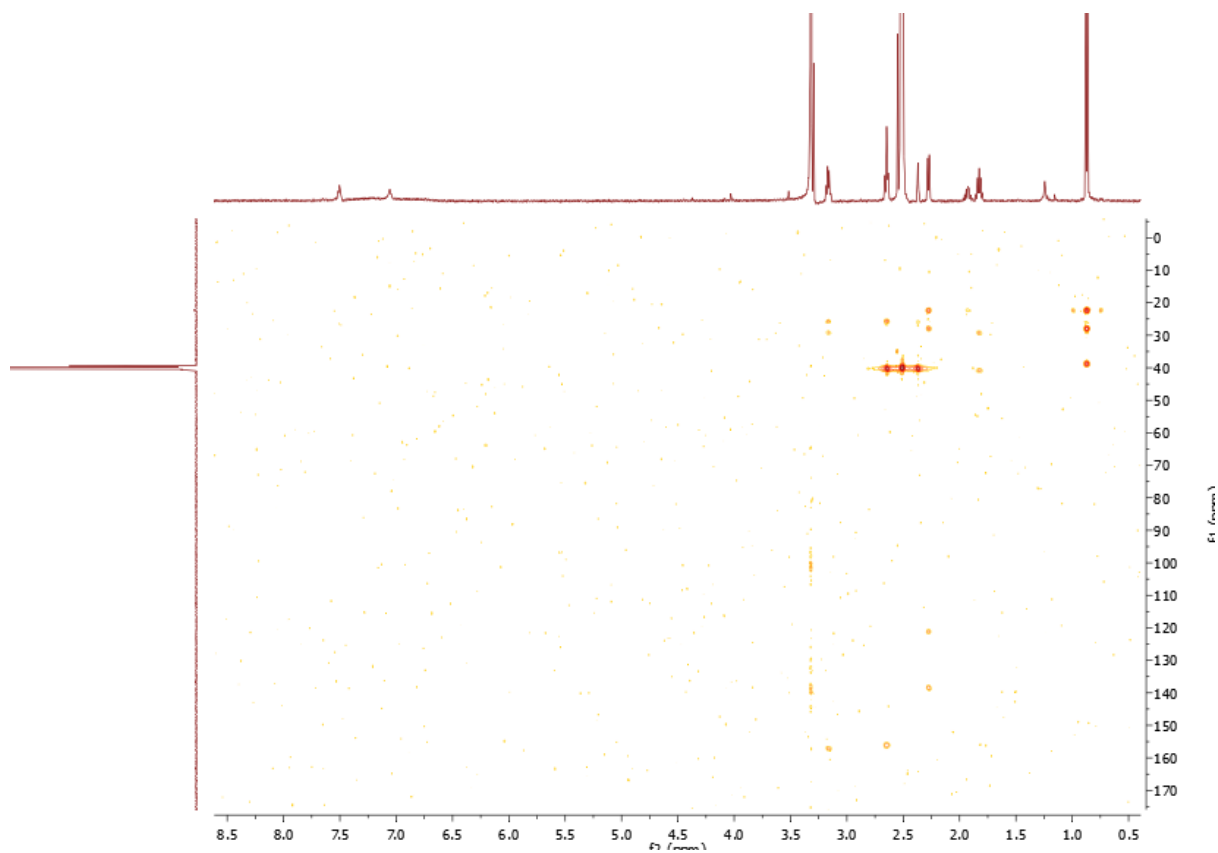

**Supplementary Figure 31.** HMBC NMR spectrum of synthesized **2e**.

## References

- [1] D. Hanahan, *J. Mol. Biol.* **1983**, *166*, 557–580.
- [2] O. Schimming, F. Fleischhacker, F. I. Nollmann, H. B. Bode, *ChemBioChem* **2014**, *15*, 1290–1294.
- [3] S. Thoma, M. Schobert, *FEMS Microbiol. Lett.* **2009**, *294*, 127–132.
- [4] K. A. J. Bozhüyük, A. Linck, A. Tietze, J. Kranz, F. Wesche, S. Nowak, F. Fleischhacker, Y.-N. Shi, P. Grün, H. B. Bode, *Nat. Chem.* **2019**, *11*, 653–661.
- [5] C. Kegler, F. I. Nollmann, T. Ahrendt, F. Fleischhacker, E. Bode, H. B. Bode, *ChemBioChem* **2014**, *15*, 826–828.
- [6] C. Hacker, X. Cai, C. Kegler, L. Zhao, A. K. Weickhmann, J. P. Wurm, H. B. Bode, J. Wöhnert, *Nat. Comm.* **2018**, *9*, 4366.
- [7] K. A. J. Bozhüyük, F. Fleischhacker, A. Linck, F. Wesche, A. Tietze, C.-P. Niesert, H. B. Bode, *Nat. Chem.* **2018**, *10*, 275–281.
- [8] E. Bode, A. O. Brachmann, C. Kegler, R. Simsek, C. Dauth, Q. Zhou, M. Kaiser, P. Klemmt, H. B. Bode, *ChemBioChem* **2015**, *16*, 1115–1119.
- [9] K. Blin, S. Shaw, K. Steinke, R. Villebro, N. Ziemert, S. Y. Lee, M. H. Medema, T. Weber, *Nucleic Acids Res.* **2019**, *47*, W81-W87.
- [10] H. B. Bode, D. Reimer, S. W. Fuchs, F. Kirchner, C. Dauth, C. Kegler, W. Lorenzen, A. O. Brachmann, P. Grün, *Chem. Eur. J.* **2012**, *18*, 2342–2348.
- [11] H. Wolff, H. B. Bode, *PloS one* **2018**, *13*, e0194297.
- [12] S. W. Fuchs, C. C. Sachs, C. Kegler, F. I. Nollmann, M. Karas, H. B. Bode, *Anal. Chem.* **2012**, *84*, 6948–6955.
- [13] A. Tanovic, S. A. Samel, L.-O. Essen, M. A. Marahiel, *Science* **2008**, *321*, 659–663.
